# Supplementary material for: Growth, Pathogenesis, and Serological Characteristics of the Japanese Encephalitis Virus Genotype IV Recent Strain 19CxBa-83-Cv
Source: MDPI journal article supplement (doi:10.3390/v15010239), 2023-01-14
Supplement: s1 [file s1]

Figure S1

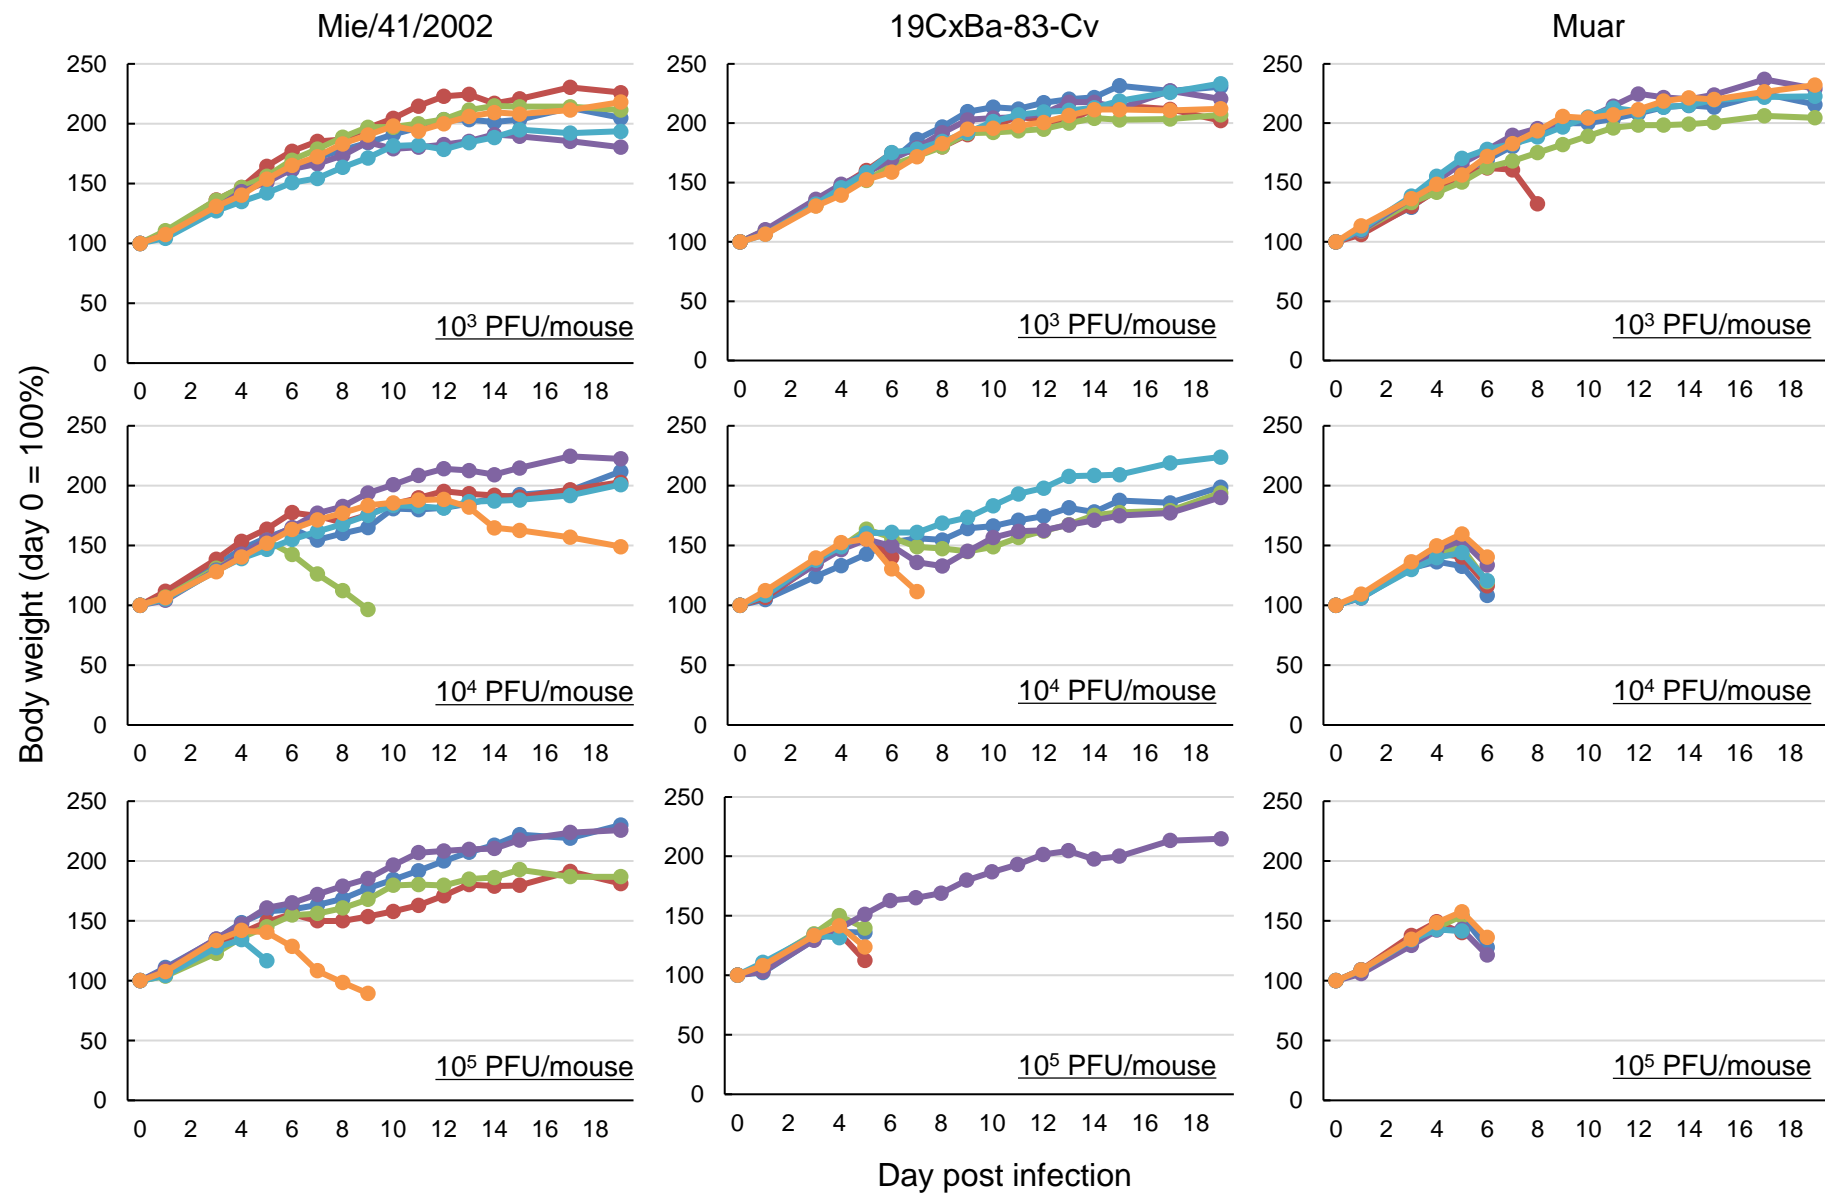

Figure S1. Body weight of mice inoculated with JEV strains (GI, GIV, GV) at three different doses ( $10^3$ ,  $10^4$ ,  $10^5$  PFU/mouse) as shown in Figure 3. Colored lines indicate individual mice.

Figure S2

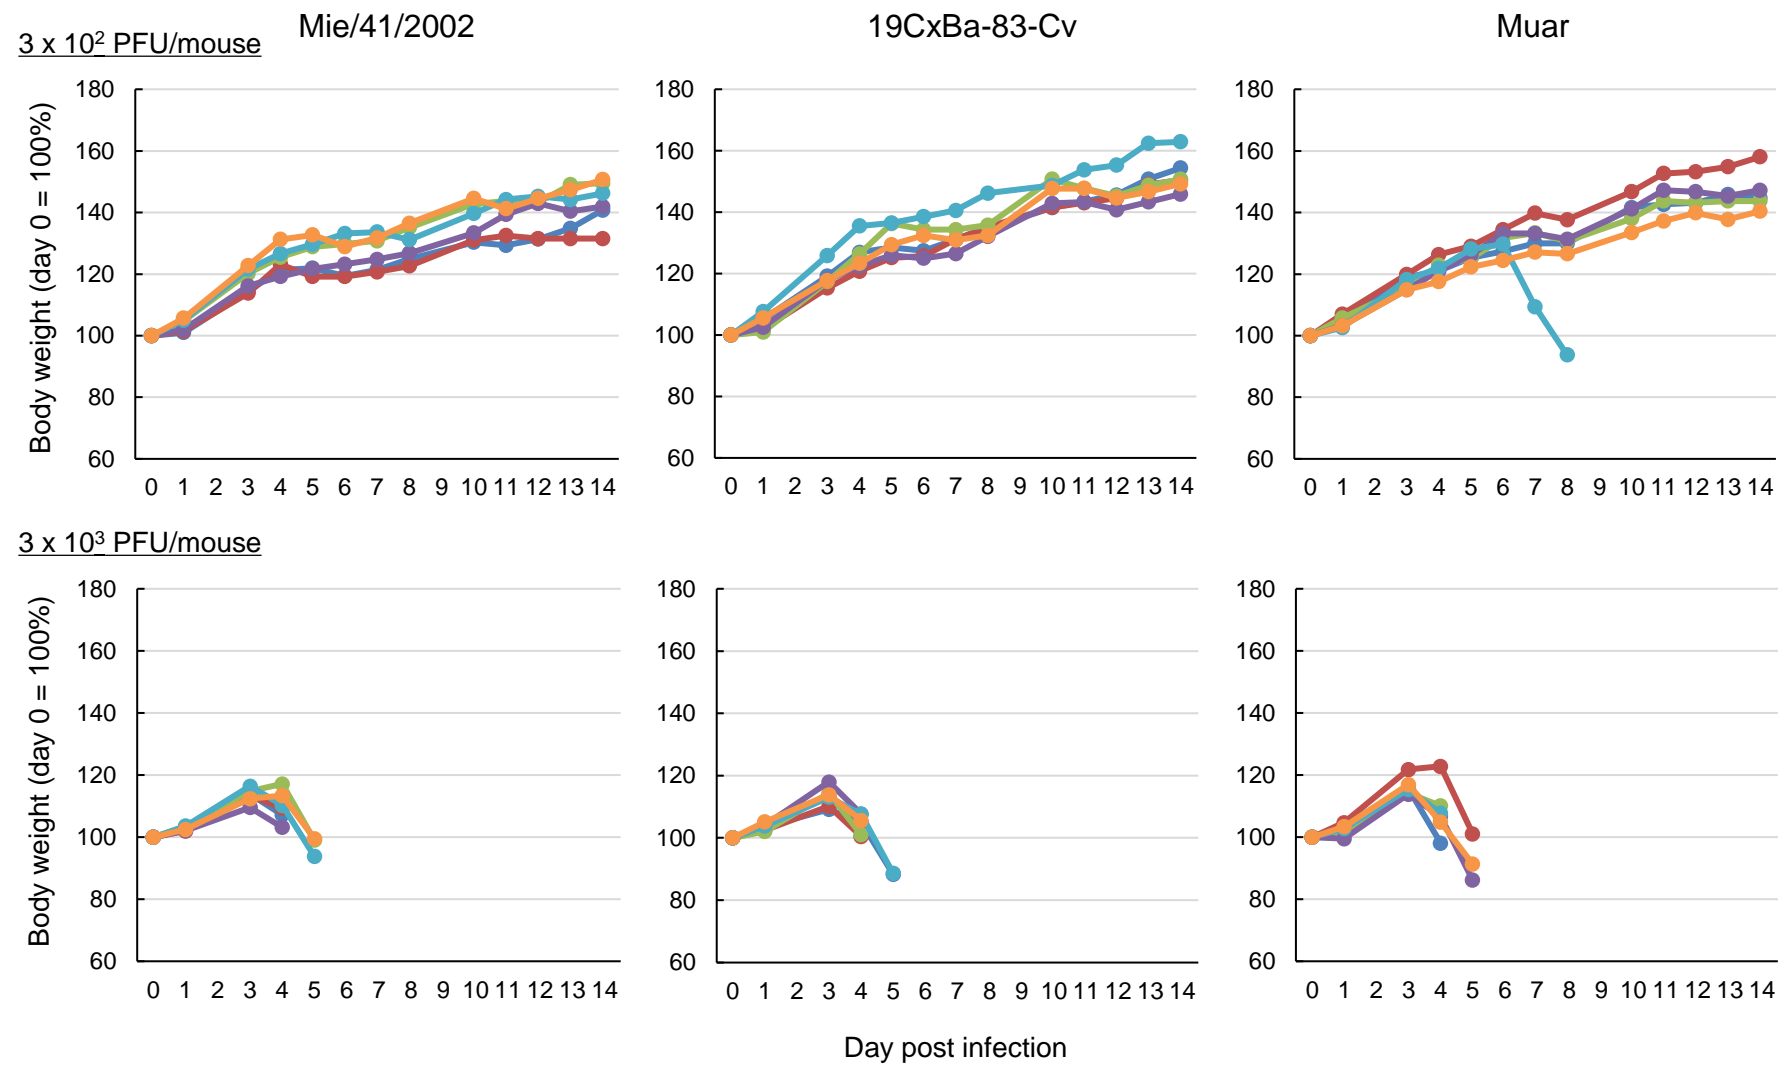

Figure S2. Body weight of mice inoculated with JEV strains (GI, GIV, GV) at two different doses ( $3 \times 10^2$ ,  $3 \times 10^3$  PFU/mouse) as shown in Figure 4. Colored lines indicate individual mice.

Figure S3

|                             |     |                                                                                                        |     |
|-----------------------------|-----|--------------------------------------------------------------------------------------------------------|-----|
| 19CxBa-83-Cv_LC579814       | 1   | FNCLGMGNRDFIEGVSGATWVDLVLEGDSCLTIMAHDRPTLDVRMINIEASQLAEVRSYCYHASVTDISTVARCPTTGEAHNDKRADSSYVCKQGFTDRG   | 100 |
| sw-22-00722-11.Q1d_ON624132 | 1   | FNCLGMGNRDFIEGVSGATWVDLVLEGDSCLTIMAHDRPTLDVRMINIEASQLAEVRSYCYHASVTDISTVARCPTTGEAHNDKRADSSYVCKQGFTDRG   | 100 |
| Hu_Tiwi 2021_OM867669       | 1   | FNCLGMGNRDFIEGVSGATWVDLVLEGDSCLTIMAHDRPTLDVRMINIEASQLAEVRSYCYHASVTDISTVARCPTTGEAHNDKRADSSYVCKQGFTDRG   | 100 |
| Bali2019_MT253731           | 1   | FNCLGMGNRDFIEGVSGATWVDLVLEGDSCLTIMAHDRPTLDVRMINIEASQLAEVRSYCYHASVTDISTVARCPTTGEAHNDKRADSSYVCKQGFTDRG   | 100 |
| sw.Bali.93_LC461961         | 1   | FNCLGMGNRDFIEGVSGATWVDLVLEGDSCLTIMAHDRPTLDVRMINIEASQLAEVRSYCYHASVTDISTVARCPTTGEAHNDKRADSSYVCKQGFTDRG   | 100 |
| JKT6468_AY184212            | 1   | FNCLGMGNRDFIEGVSGATWVDLVLEGDSCLTIMAHDRPTLDVRMINIEASQLAEVRSYCYHASVTDISTVARCPTTGEAHNDKRADSSYVCKQGFTDRG   | 100 |
| 19CxBa-83-Cv_LC579814       | 101 | WGNCGCLFGKGSIDTCAKFSCTSKATGKTIQPENIKYEVGIFVHGTTTSENHGNYTAQIGASQAAKFTITPNAPSITLKLGDYGEVTLDCPRSGLNTEA    | 200 |
| sw-22-00722-11.Q1d_ON624132 | 101 | WGNCGCLFGKGSIDTCAKFSCTSKATGKTIQPENIKYEVGIFVHGTTTSENHGNYTAQIGASQAAKFTITPNAPSITLKLGDYGEVTLDCPRSGLNTEA    | 200 |
| Hu_Tiwi 2021_OM867669       | 101 | WGNCGCLFGKGSIDTCAKFSCTSKATGKTIQPENIKYEVGIFVHGTTTSENHGNYTAQIGASQAAKFTITPNAPSITLKLGDYGEVTLDCPRSGLNTEA    | 200 |
| Bali2019_MT253731           | 101 | WGNCGCLFGKGSIDTCAKFSCTSKATGKTIQPENIKYEVGIFVHGTTTSENHGNYTAQIGASQAAKFTITPNAPSITLKLGDYGEVTLDCPRSGLNTEA    | 200 |
| sw.Bali.93_LC461961         | 101 | WGNCGCLFGKGSIDTCAKFSCTSKATGKTIQPENIKYEVGIFVHGTTTSENHGNYTAQIGASQAAKFTITPNAPSITLKLGDYGEVTLDCPRSGLNTEA    | 200 |
| JKT6468_AY184212            | 101 | WGNCGCLFGKGSIDTCAKFSCTSKATGKTIQPENIKYEVGIFVHGTTTSENHGNYTAQIGASQAAKFTITPNAPSITLKLGDYGEVTLDCPRSGLNTEA    | 200 |
| 19CxBa-83-Cv_LC579814       | 201 | FYVMTVGSKSFLVHREWFHDLALPWTSSNTAWRNRELLMEFEEAHATKQSVVALGSQEGALHQALAGAIIVVEYSSSVKLTSGHLKCRCLKMDKLTCLKGTT | 300 |
| sw-22-00722-11.Q1d_ON624132 | 201 | FYVMTVGSKSFLVHREWFHDLALPWTSSNTAWRNRELLMEFEEAHATKQSVVALGSQEGALHQALAGAIIVVEYSSSVKLTSGHLKCRCLKMDKLTCLKGTT | 300 |
| Hu_Tiwi 2021_OM867669       | 201 | FYVMTVGSKSFLVHREWFHDLALPWTSSNTAWRNRELLMEFEEAHATKQSVVALGSQEGALHQALAGAIIVVEYSSSVKLTSGHLKCRCLKMDKLTCLKGTT | 300 |
| Bali2019_MT253731           | 201 | FYVMTVGSKSFLVHREWFHDLALPWTSSNTAWRNRELLMEFEEAHATKQSVVALGSQEGALHQALAGAIIVVEYSSSVKLTSGHLKCRCLKMDKLTCLKGTT | 300 |
| sw.Bali.93_LC461961         | 201 | FYVMTVGSKSFLVHREWFHDLALPWTSSNTAWRNRELLMEFEEAHATKQSVVALGSQEGALHQALAGAIIVVEYSSSVKLTSGHLKCRCLKMDKLTCLKGTT | 300 |
| JKT6468_AY184212            | 201 | FYVMTVGSKSFLVHREWFHDLALPWTSSNTAWRNRELLMEFEEAHATKQSVVALGSQEGALHQALAGAIIVVEYSSSVKLTSGHLKCRCLKMDKLTCLKGTT | 300 |
| 19CxBa-83-Cv_LC579814       | 301 | YGMCTEKFSFAKNPADTGHGTVVIELQYSGSDGPKIPIVSVASLNDMTPVGRLVTVNPFVATSSSNSKVLVEMEPFPGDSYIVVGRGDKQINHHWHKPG    | 400 |
| sw-22-00722-11.Q1d_ON624132 | 301 | YGMCTEKFSFAKNPADTGHGTVVIELQYSGSDGPKIPIVSVASLNDMTPVGRLVTVNPFVATSSSNSKVLVEMEPFPGDSYIVVGRGDKQINHHWHKPG    | 400 |
| Hu_Tiwi 2021_OM867669       | 301 | YGMCTEKFSFAKNPADTGHGTVVIELQYSGSDGPKIPIVSVASLNDMTPVGRLVTVNPFVATSSSNSKVLVEMEPFPGDSYIVVGRGDKQINHHWHKPG    | 400 |
| Bali2019_MT253731           | 301 | YGMCTEKFSFAKNPADTGHGTVVIELQYSGSDGPKIPIVSVASLNDMTPVGRLVTVNPFVATSSSNSKVLVEMEPFPGDSYIVVGRGDKQINHHWHKPG    | 400 |
| sw.Bali.93_LC461961         | 301 | YGMCTEKFSFAKNPADTGHGTVVIELQYSGSDGPKIPIVSVASLNDMTPVGRLVTVNPFVATSSSNSKVLVEMEPFPGDSYIVVGRGDKQINHHWHKPG    | 400 |
| JKT6468_AY184212            | 301 | YGMCTEKFSFAKNPADTGHGTVVIELLYSGSDGPKIPIVSVASLNDMTPVGRLVTVNPFVATSSSNSQVLVEMEPFPGDSYIVVGRGDKQINHHWHKPG    | 400 |
| 19CxBa-83-Cv_LC579814       | 401 | STLKGAFSTTLKGAQRLAALGDTAWDFGSIIGGVFNSIGKAVHQVFVGGAFRTLFGGMSWITQGLMGALLLWMCVNARDRSIAMAFLVTGGTLLFLATNVHA | 500 |
| sw-22-00722-11.Q1d_ON624132 | 401 | STLKGAFSTTLKGAQRLAALGDTAWDFGSIIGGVFNSIGKAVHQVFVGGAFRTLFGGMSWITQGLMGALLLWMCVNARDRSIAMAFLVTGGTLLFLATNVHA | 500 |
| Hu_Tiwi 2021_OM867669       | 401 | STLKGAFSTTLKGAQRLAALGDTAWDFGSIIGGVFNSIGKAVHQVFVGGAFRTLFGGMSWITQGLMGALLLWMCVNARDRSIAMAFLVTGGTLLFLATNVHA | 500 |
| Bali2019_MT253731           | 401 | STLKGAFSTTLKGAQRLAALGDTAWDFGSIIGGVFNSIGKAVHQVFVGGAFRTLFGGMSWITQGLMGALLLWMCVNARDRSIAMAFLVTGGTLLFLATNVHA | 500 |
| sw.Bali.93_LC461961         | 401 | STLKGAFSTTLKGAQRLAALGDTAWDFGSIIGGVFNSIGKAVHQVFVGGAFRTLFGGMSWITQGLMGALLLWMCVNARDRSIAMAFLVTGGTLLFLATNVHA | 500 |
| JKT6468_AY184212            | 401 | STLKGAFSTTLKGAQRLAALGDTAWDFGSIIGGVFNSIGKAVHQVFVGGAFRTLFGGMSWITQGLMGALLLWMCVNARDRSIAMAFLVTGGTLLFLATNVHA | 500 |

Figure S3. Comparison of the complete amino acid sequence of E protein (500 residues) in GIV JEV strains.

Figure S4

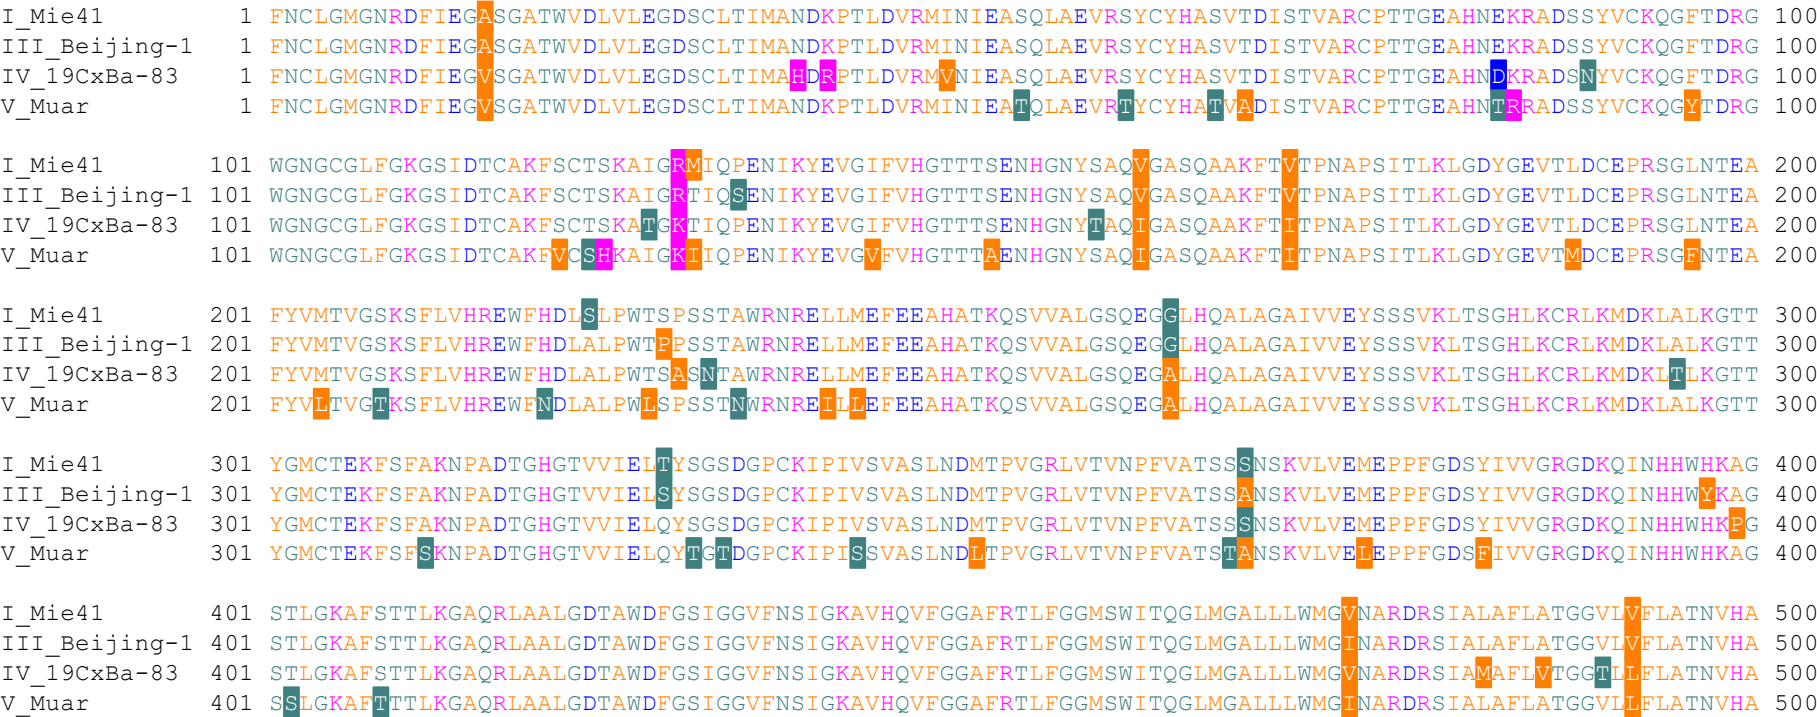

| Strain vs. strain            | AA identity | Strain       | AA difference<br>(vs. GIII_Beijing-1) |
|------------------------------|-------------|--------------|---------------------------------------|
| Mie/41/2002 vs. 19CxBa-83-Cv | 95.4%       | Mie/41/2002  | 8/500 (1.6%)                          |
| Mie/41/2002 vs. Muar         | 91.6%       | 19CxBa-83-Cv | 26/500 (5.2%)                         |
| 19CxBa-83-Cv vs. Muar        | 90.6%       | Muar         | 42/500 (8.4%)                         |

Figure S4. Comparison of the complete amino acid sequence of E protein (500 residues) of Mie/41/2002 (GI), Beijing-1 (GIII, accession no. L48961), 19CxBa-83-Cv (GIV), and Muar (GV) strains of JEV.
